# Supplementary material for: Associations of semaglutide with incidence and recurrence of alcohol use disorder in real-world population
Source: PubMed Central journal article supplement (PMC11133479; doi:10.1038/s41467-024-48780-6), 2024-05-28
Supplement: 41467_2024_48780_MOESM1_ESM.pdf [file 41467_2024_48780_MOESM1_ESM.pdf]

**Supplementary Table 1:** Characteristics of the study population with T2DM and no prior history of AUD. SMD – standardized mean differences. \*SMD less than 0.1, indicating cohort balance.

|                                                                     | Before Propensity-Score Matching |                                              |        | After Propensity-Score Matching |                                              |       |
|---------------------------------------------------------------------|----------------------------------|----------------------------------------------|--------|---------------------------------|----------------------------------------------|-------|
|                                                                     | semaglutide cohort               | non-GLP-1RA anti-diabetes medications cohort | SMD    | semaglutide cohort              | non-GLP-1RA anti-diabetes medications cohort | SMD   |
| <b>Total number</b>                                                 | 25,686                           | 573,117                                      |        | 25,670                          | 25,670                                       |       |
| <b>Age at index event (years, mean±SD)</b>                          | 58.2 ± 11.9                      | 63.1 ± 13.3                                  | 0.39 * | 58.2 ± 11.9                     | 57.7 ± 13.6                                  | 0.04  |
| <b>Sex (%)</b>                                                      |                                  |                                              |        |                                 |                                              |       |
| Female                                                              | 45.8                             | 44.7                                         | 0.02   | 45.8                            | 44.7                                         | 0.02  |
| Male                                                                | 46.1                             | 50.1                                         | 0.08   | 46.1                            | 47.0                                         | 0.02  |
| Unknown                                                             | 8.1                              | 5.2                                          | 0.03   | 8.1                             | 8.3                                          | 0.006 |
| <b>Ethnicity (%)</b>                                                |                                  |                                              |        |                                 |                                              |       |
| Hispanic/Latinx                                                     | 6.6                              | 9.1                                          | 0.09   | 6.6                             | 6.3                                          | 0.01  |
| Not Hispanic/Latinx                                                 | 63.3                             | 56.3                                         | 0.14 * | 63.3                            | 63.9                                         | 0.01  |
| Unknown                                                             | 30.0                             | 34.6                                         | 0.09   | 30.0                            | 29.7                                         | 0.007 |
| <b>Race (%)</b>                                                     |                                  |                                              |        |                                 |                                              |       |
| Asian                                                               | 4.7                              | 5.5                                          | 0.04   | 4.7                             | 4.7                                          | 0.002 |
| Black                                                               | 14.7                             | 17.1                                         | 0.06   | 14.7                            | 14.6                                         | 0.005 |
| White                                                               | 60.2                             | 57.7                                         | 0.05   | 60.2                            | 60.3                                         | 0.001 |
| Unknown                                                             | 15.2                             | 14.9                                         | 0.007  | 15.2                            | 15.2                                         | 0.002 |
| <b>Marital status (%)</b>                                           |                                  |                                              |        |                                 |                                              |       |
| Never Married                                                       | 10.4                             | 10.4                                         | 0.003  | 10.4                            | 10.3                                         | 0.005 |
| Divorced                                                            | 5.3                              | 4.5                                          | 0.04   | 5.3                             | 5.2                                          | 0.003 |
| Widowed                                                             | 4.9                              | 6.1                                          | 0.06   | 4.9                             | 4.7                                          | 0.01  |
| <b>Adverse socioeconomic determinants of health (%)</b>             | 2.9                              | 2.1                                          | 0.05   | 2.9                             | 2.8                                          | 0.004 |
| <b>Problems related to lifestyle (%)</b>                            | 6.7                              | 4.1                                          | 0.11 * | 6.6                             | 6.7                                          | 0.001 |
| <b>Family history of mental and behavioral disorders</b>            | 0.4                              | 0.3                                          | 0.01   | 0.4                             | 0.4                                          | 0.004 |
| <b>Pre-existing medical conditions, procedures, medications (%)</b> |                                  |                                              |        |                                 |                                              |       |
| Depression                                                          | 21.5                             | 13.2                                         | 0.22 * | 21.5                            | 20.7                                         | 0.02  |
| Mood disorders                                                      | 24.9                             | 16.1                                         | 0.22 * | 24.9                            | 24.1                                         | 0.02  |
| Anxiety disorders                                                   | 26.1                             | 15.8                                         | 0.26 * | 26.1                            | 25.3                                         | 0.02  |
| Psychotic disorders                                                 | 1.3                              | 2.0                                          | 0.06   | 1.3                             | 1.2                                          | 0.01  |
| Behavioral disorders                                                | 5.4                              | 1.8                                          | 0.20 * | 5.3                             | 5.1                                          | 0.01  |
| Disorders of adult personality and behavior                         | 0.9                              | 0.5                                          | 0.05   | 0.9                             | 0.9                                          | <.001 |
| Behavioral and emotional disorders with onset in                    | 1.9                              | 0.8                                          | 0.09   | 1.9                             | 1.8                                          | 0.01  |

|                                                |      |      |       |      |      |       |
|------------------------------------------------|------|------|-------|------|------|-------|
| childhood and adolescence                      |      |      |       |      |      |       |
| Conduct disorders                              | 0.1  | 0.1  | 0.008 | 0.1  | 0.2  | 0.01  |
| Symptoms and signs involving emotional state   | 3.3  | 2.0  | 0.08  | 3.3  | 3.3  | 0.003 |
| Chronic pain                                   | 20.8 | 10.7 | 0.28* | 20.8 | 19.8 | 0.03  |
| Cancer                                         | 32.1 | 18.7 | 0.31* | 32.1 | 31.0 | 0.02  |
| Cannabis use disorder                          | 0.8  | 1.1  | 0.04  | 0.8  | 0.8  | <.001 |
| Opioid use disorder                            | 1.2  | 1.0  | 0.02  | 1.2  | 1.2  | <.001 |
| Tobacco use disorder                           | 13.2 | 13.5 | 0.009 | 13.2 | 13.1 | 0.003 |
| Cocaine use disorder                           | 0.3  | 0.6  | 0.03  | 0.3  | 0.4  | 0.002 |
| Other stimulant disorders                      | 0.3  | 0.5  | 0.02  | 0.3  | 0.3  | 0.005 |
| Other psychoactive substance related disorders | 0.8  | 0.7  | 0.005 | 0.8  | 0.8  | 0.001 |
| Hypertension                                   | 86.0 | 87.1 | 0.03  | 86.0 | 85.1 | 0.02  |
| Disorders of lipoprotein                       | 85.9 | 65.8 | 0.49* | 85.9 | 86.1 | 0.004 |
| Hyperlipidemia                                 | 64.7 | 50.1 | 0.30* | 64.7 | 64.1 | 0.01  |
| Hypercholesterolemia                           | 27.0 | 16.6 | 0.25* | 27.0 | 26.2 | 0.02  |
| Ischemic heart diseases                        | 23.7 | 26.8 | 0.07  | 23.7 | 22.6 | 0.03  |
| Other forms of heart disease                   | 30.3 | 33.5 | 0.07  | 30.3 | 28.7 | 0.03  |
| Cerebral infarction                            | 4.6  | 5.8  | 0.06  | 4.6  | 4.3  | 0.01  |
| Cerebrovascular diseases                       | 9.9  | 11.6 | 0.06  | 9.9  | 9.3  | 0.02  |
| Morbid obesity                                 | 28.1 | 12.0 | 0.41* | 28.1 | 27.5 | 0.01  |
| Obesity, unspecified                           | 39.9 | 18.8 | 0.48* | 39.8 | 38.9 | 0.02  |
| Other obesity                                  | 7.7  | 2.0  | 0.27* | 7.7  | 7.2  | 0.02  |
| Substance abuse treatment                      | 0.0  | 0.0  | 0.003 | 0.0  | 0.0  | <.001 |
| Psychotherapy                                  | 2.1  | 0.6  | 0.13* | 2.1  | 2.1  | 0.002 |
| Baclonfen                                      | 3.1  | 1.5  | 0.10* | 3.1  | 2.8  | 0.02  |
| Gabapentin                                     | 23.1 | 14.0 | 0.24* | 23.0 | 22.2 | 0.02  |
| Naltrexone                                     | 0.6  | 0.1  | 0.09  | 0.6  | 0.6  | 0.003 |
| Topiramate                                     | 3.4  | 1.0  | 0.16* | 3.4  | 3.1  | 0.01  |
| <b>Medical visit types (%)</b>                 |      |      |       |      |      |       |
| Outpatient                                     | 88.7 | 63.9 | 0.61* | 88.7 | 89.5 | 0.03  |
| Inpatient                                      | 31.5 | 36.6 | 0.11* | 31.5 | 29.8 | 0.04  |
| Emergency                                      | 37.0 | 27.7 | 0.20* | 36.9 | 35.6 | 0.03  |

|         |     |     |           |     |     |      |
|---------|-----|-----|-----------|-----|-----|------|
| Virtual | 4.6 | 1.6 | 0.17<br>* | 4.6 | 4.4 | 0.01 |
|---------|-----|-----|-----------|-----|-----|------|

**Supplementary Table 2:** Characteristics of the study population with T2DM and a prior history of AUD. SMD – standardized mean differences. \*SMD less than 0.1, indicating cohort balance.

|                                                                     | Before Propensity-Score Matching |                                              |       | After Propensity-Score Matching |                                              |       |
|---------------------------------------------------------------------|----------------------------------|----------------------------------------------|-------|---------------------------------|----------------------------------------------|-------|
|                                                                     | semaglutide cohort               | non-GLP-1RA anti-diabetes medications cohort | SMD   | semaglutide cohort              | non-GLP-1RA anti-diabetes medications cohort | SMD   |
| <b>Total number</b>                                                 | 668                              | 21,445                                       |       | 653                             | 653                                          |       |
| <b>Age at index event (mean±SD)</b>                                 | 57.1 ± 11.0                      | 57.2± 11.5                                   | 0.008 | 57.2 ± 11.1                     | 57.6 ± 11.5                                  | 0.03  |
| <b>Sex (%)</b>                                                      |                                  |                                              |       |                                 |                                              |       |
| Female                                                              | 26.2                             | 19.9                                         | 0.15* | 25.6                            | 27.1                                         | 0.04  |
| Male                                                                | 68.0                             | 76.0                                         | 0.18* | 68.6                            | 68.0                                         | 0.01  |
| Unknown                                                             | 5.8                              | 4.1                                          | 0.08  | 5.8                             | 4.9                                          | 0.04  |
| <b>Ethnicity (%)</b>                                                |                                  |                                              |       |                                 |                                              |       |
| Hispanic/Latinx                                                     | 7.0                              | 8.8                                          | 0.07  | 7.0                             | 10.0                                         | 0.10* |
| Not Hispanic/Latinx                                                 | 66.8                             | 60.4                                         | 0.13* | 66.9                            | 65.5                                         | 0.03  |
| Unknown                                                             | 26.2                             | 30.8                                         | 0.10* | 26.0                            | 24.5                                         | 0.03  |
| <b>Race (%)</b>                                                     |                                  |                                              |       |                                 |                                              |       |
| Asian                                                               | 4.5                              | 2.5                                          | 0.11* | 4.6                             | 5.5                                          | 0.04  |
| Black                                                               | 16.3                             | 20.1                                         | 0.10* | 16.4                            | 17.9                                         | 0.04  |
| White                                                               | 57.0                             | 57.8                                         | 0.02  | 57.0                            | 53.9                                         | 0.06  |
| Unknown                                                             | 16.3                             | 14.4                                         | 0.05  | 16.2                            | 15.9                                         | 0.008 |
| <b>Marital status (%)</b>                                           |                                  |                                              |       |                                 |                                              |       |
| Never Married                                                       | 11.7                             | 16.1                                         | 0.13* | 11.8                            | 11.9                                         | 0.005 |
| Divorced                                                            | 8.1                              | 6.4                                          | 0.06  | 7.7                             | 6.3                                          | 0.05  |
| Widowed                                                             | 3.1                              | 3.1                                          | 0.001 | 3.2                             | 4.0                                          | 0.04  |
| <b>Adverse socioeconomic determinants of health (%)</b>             | 12.7                             | 9.8                                          | 0.09  | 12.3                            | 14.1                                         | 0.05  |
| <b>Problems related to lifestyle (%)</b>                            | 24.4                             | 16.4                                         | 0.20* | 24.2                            | 26.2                                         | 0.05  |
| <b>Family history of mental and behavioral disorders</b>            | 3.1                              | 1.6                                          | 0.10* | 2.9                             | 3.4                                          | 0.03  |
| <b>Pre-existing medical conditions, procedures, medications (%)</b> |                                  |                                              |       |                                 |                                              |       |
| Depression                                                          | 47.9                             | 28.5                                         | 0.41* | 47.0                            | 48.1                                         | 0.02  |
| Mood disorders                                                      | 55.2                             | 35.8                                         | 0.40* | 54.5                            | 56.5                                         | 0.04  |
| Anxiety disorders                                                   | 52.1                             | 32.7                                         | 0.40* | 51.1                            | 51.0                                         | 0.003 |
| Psychotic disorders                                                 | 7.5                              | 7.4                                          | 0.002 | 7.2                             | 8.0                                          | 0.03  |

|                                                                            |      |      |       |      |      |       |
|----------------------------------------------------------------------------|------|------|-------|------|------|-------|
| Behavioral disorders                                                       | 14.7 | 3.4  | 0.40* | 13.8 | 14.7 | 0.03  |
| Disorders of adult personality and behavior                                | 5.5  | 3.0  | 0.12* | 5.2  | 5.5  | 0.01  |
| Behavioral and emotional disorders with onset in childhood and adolescence | 6.0  | 2.4  | 0.18* | 5.8  | 5.8  | <.001 |
| Conduct disorders                                                          | 1.5  | 0.7  | 0.08  | 1.5  | 1.5  | <.001 |
| Symptoms and signs involving emotional state                               | 16.8 | 12.0 | 0.14* | 15.9 | 15.8 | 0.004 |
| Chronic pain                                                               | 40.7 | 18.8 | 0.49* | 39.7 | 41.0 | 0.03  |
| Cancer                                                                     | 48.2 | 20.4 | 0.61* | 47.3 | 47.8 | 0.009 |
| Cannabis use disorder                                                      | 9.1  | 10.1 | 0.03  | 9.2  | 10.3 | 0.04  |
| Opioid use disorder                                                        | 8.7  | 6.7  | 0.07  | 8.3  | 10.0 | 0.06  |
| Tobacco use disorder                                                       | 45.4 | 47.1 | 0.04  | 45.3 | 47.0 | 0.03  |
| Cocaine use disorder                                                       | 8.8  | 10.0 | 0.04  | 8.6  | 10.9 | 0.08  |
| Other stimulant disorders                                                  | 3.6  | 4.2  | 0.03  | 3.7  | 3.5  | 0.008 |
| Other psychoactive substance related disorders                             | 13.8 | 10.1 | 0.11* | 13.0 | 12.9 | 0.005 |
| Hypertension                                                               | 93.7 | 88.8 | 0.18* | 93.7 | 93.9 | 0.006 |
| Disorders of lipoprotein                                                   | 88.5 | 58.2 | 0.73* | 88.2 | 87.4 | 0.02  |
| Hyperlipidemia                                                             | 77.4 | 48.2 | 0.63* | 76.9 | 76.4 | 0.01  |
| Hypercholesterolemia                                                       | 36.4 | 15.6 | 0.49* | 35.4 | 33.8 | 0.03  |
| Ischemic heart diseases                                                    | 36.8 | 27.6 | 0.20* | 36.4 | 35.2 | 0.03  |
| Other forms of heart disease                                               | 51.3 | 41.3 | 0.20* | 50.8 | 49.9 | 0.02  |
| Cerebral infarction                                                        | 9.7  | 7.7  | 0.07  | 9.5  | 9.3  | 0.005 |
| Cerebrovascular diseases                                                   | 20.7 | 15.6 | 0.13* | 20.2 | 19.1 | 0.03  |
| Morbid obesity                                                             | 34.0 | 11.4 | 0.56* | 32.9 | 29.9 | 0.07  |
| Obesity, unspecified                                                       | 58.8 | 23.2 | 0.78* | 57.9 | 58.8 | 0.02  |
| Other obesity                                                              | 10.2 | 2.1  | 0.34* | 9.5  | 11.2 | 0.06  |
| Substance abuse treatment                                                  | 4.8  | 5.5  | 0.03  | 4.4  | 4.3  | 0.007 |
| Psychotherapy                                                              | 14.5 | 3.2  | 0.41* | 13.3 | 13.3 | <.001 |
| Acamproate                                                                 | 2.4  | 0.7  | 0.14* | 2.1  | 1.8  | 0.02  |
| Disulfiram                                                                 | 1.8  | 0.5  | 0.12* | 1.5  | 1.8  | 0.02  |
| Baclonfen                                                                  | 7.5  | 2.7  | 0.22* | 6.9  | 8.6  | 0.06  |
| Gabapentin                                                                 | 38.2 | 21.0 | 0.38* | 37.4 | 39.8 | 0.05  |

|                                |      |      |           |      |      |           |
|--------------------------------|------|------|-----------|------|------|-----------|
| Naltrexone                     | 5.1  | 2.0  | 0.17<br>* | 4.6  | 4.7  | 0.00<br>7 |
| Topiramate                     | 6.4  | 1.6  | 0.25<br>* | 6.1  | 6.3  | 0.00<br>6 |
| <b>Medical visit types (%)</b> |      |      |           |      |      |           |
| Outpatient                     | 94.0 | 63.5 | 0.80<br>* | 93.9 | 94.3 | 0.02      |
| Inpatient                      | 63.3 | 58.5 | 0.10<br>* | 62.8 | 61.1 | 0.04      |
| Emergency                      | 65.7 | 44.9 | 0.43<br>* | 64.9 | 66.3 | 0.03      |
| Virtual                        | 7.6  | 3.5  | 0.18<br>* | 7.7  | 6.1  | 0.06      |

**Supplementary Table 3:** Clinical diagnosis, and other codes used in TriNetX platform that are used to determine the status of variables for study population definitions, exposures, outcomes, and for propensity-score matching for cohorts.

|                                                       |         |                                                                                                                                                                                                                                                                                                                                                                                                                                                                                                                                                                                                                                                                                                                                                                                                                                                                                                                                                                                                                                                                                                                                                                                                                                                                                                                                                                                                                                             |                |
|-------------------------------------------------------|---------|---------------------------------------------------------------------------------------------------------------------------------------------------------------------------------------------------------------------------------------------------------------------------------------------------------------------------------------------------------------------------------------------------------------------------------------------------------------------------------------------------------------------------------------------------------------------------------------------------------------------------------------------------------------------------------------------------------------------------------------------------------------------------------------------------------------------------------------------------------------------------------------------------------------------------------------------------------------------------------------------------------------------------------------------------------------------------------------------------------------------------------------------------------------------------------------------------------------------------------------------------------------------------------------------------------------------------------------------------------------------------------------------------------------------------------------------|----------------|
| <b>Eligibility (inclusion and exclusion criteria)</b> | AUD     | <ul style="list-style-type: none"> <li>Alcohol use disorders (ICD-10 code: F10)</li> </ul>                                                                                                                                                                                                                                                                                                                                                                                                                                                                                                                                                                                                                                                                                                                                                                                                                                                                                                                                                                                                                                                                                                                                                                                                                                                                                                                                                  | present/absent |
|                                                       | Obesity | <ul style="list-style-type: none"> <li>Obesity due to excess calories (ICD-10 code: E66.0)</li> <li>Morbid (severe) obesity due to excess calories (ICD-10 code: E66.01)</li> <li>Drug-induced obesity (ICD-10 code: E66.1)</li> <li>Morbid (severe) obesity with alveolar hypoventilation (ICD-10 code: E66.2)</li> <li>Other obesity (ICD-10 code: E66.8)</li> <li>Obesity, unspecified (ICD-10 code: E66.9)</li> <li>Body mass index [BMI] 30-39, adult (ICD-10 code: Z68.3)</li> <li>Body mass index [BMI] 40 or greater, adult (ICD-10 code: Z68.4)</li> <li>Body mass index [BMI] 30.0-30.9, adult (ICD-10 code: Z68.30)</li> <li>Body mass index [BMI] 31.0-31.9, adult (ICD-10 code: Z68.31)</li> <li>Body mass index [BMI] 32.0-32.9, adult (ICD-10 code: Z68.32)</li> <li>Body mass index [BMI] 33.0-33.9, adult (ICD-10 code: Z68.33)</li> <li>Body mass index [BMI] 34.0-34.9, adult (ICD-10 code: Z68.34)</li> <li>Body mass index [BMI] 35.0-35.9, adult (ICD-10 code: Z68.35)</li> <li>Body mass index [BMI] 36.0-36.9, adult (ICD-10 code: Z68.36)</li> <li>Body mass index [BMI] 37.0-37.9, adult (ICD-10 code: Z68.37)</li> <li>Body mass index [BMI] 38.0-38.9, adult (ICD-10 code: Z68.38)</li> <li>Body mass index [BMI] 39.0-39.9, adult (ICD-10 code: Z68.39)</li> <li>Body mass index [BMI] 40.0-44.9, adult (ICD-10 code: Z68.41)</li> <li>Body mass index [BMI] 45.0-49.9, adult (ICD-10 code: Z68.42)</li> </ul> | present/absent |

|                                                                    |                                        |                                                                                                                                                                                                                                                                                                                                                                                                                                                                                                                                                                                                                                                                                                                  |                |
|--------------------------------------------------------------------|----------------------------------------|------------------------------------------------------------------------------------------------------------------------------------------------------------------------------------------------------------------------------------------------------------------------------------------------------------------------------------------------------------------------------------------------------------------------------------------------------------------------------------------------------------------------------------------------------------------------------------------------------------------------------------------------------------------------------------------------------------------|----------------|
|                                                                    |                                        | <ul style="list-style-type: none"> <li>• Body mass index [BMI] 50.0-59.9, adult (ICD-10 code: Z68.43)</li> <li>• Body mass index [BMI] 60.0-69.9, adult (ICD-10 code: Z68.44)</li> <li>• Body mass index [BMI] 70 or greater, adult (ICD-10 code: Z68.45)</li> </ul>                                                                                                                                                                                                                                                                                                                                                                                                                                             |                |
|                                                                    | T2DM                                   | Type 2 diabetes mellitus (ICD-10 code: E11)                                                                                                                                                                                                                                                                                                                                                                                                                                                                                                                                                                                                                                                                      | present/absent |
|                                                                    | Obesity-related comorbidities          | <ul style="list-style-type: none"> <li>• Type 2 diabetes mellitus (ICD-10 code: E11)</li> <li>• Hypertensive diseases (ICD-10 code: E11)</li> <li>• Disorders of lipoprotein metabolism and other lipidemias (ICD-10 code: E78)</li> <li>• Pure hypercholesterolemia (ICD-10 code: E78.0)</li> <li>• Mixed hyperlipidemia (ICD-10 code: E78.2)</li> <li>• Other hyperlipidemia (ICD-10 code: E78.2)</li> <li>• Hyperlipidemia, unspecified (ICD-10 code: E78.5)</li> <li>• Ischemic heart diseases (ICD-10 code: I20-I25)</li> <li>• Other forms of heart disease (ICD-10 code: I30-I5A)</li> <li>• Cerebral infarction (ICD-10 code: I63)</li> <li>• Cerebrovascular diseases (ICD-10 code: I60-I69)</li> </ul> | present/absent |
|                                                                    | Bariatric surgery                      | <ul style="list-style-type: none"> <li>• Bariatric surgery status (ICD-10 code: Z98.84)</li> <li>• Gastrointestinal System / Bypass / Stomach (ICD10 code: :0D16)</li> </ul>                                                                                                                                                                                                                                                                                                                                                                                                                                                                                                                                     | present/absent |
|                                                                    | Other GLP-1RA medications              | <ul style="list-style-type: none"> <li>• lixisenatide (RxNorm code: 1440051)</li> <li>• albiglutide (RxNorm code: 1534763)</li> <li>• dulaglutide (RxNorm code: 1551291)</li> <li>• liraglutide (RxNorm code: 475968)</li> <li>• exenatide (RxNorm code: 60548)</li> <li>• tirzepatide (RxNorm code: 2601723)</li> </ul>                                                                                                                                                                                                                                                                                                                                                                                         | present/absent |
| <b>Treatment strategies</b>                                        | Semaglutide                            | Semaglutide (RxNorm code: 1991302)                                                                                                                                                                                                                                                                                                                                                                                                                                                                                                                                                                                                                                                                               | present/absent |
|                                                                    | non-GLP-1RA anti-obesity medications   | <ul style="list-style-type: none"> <li>• Orlistat (RxNorm code: 37925)</li> <li>• Phentermine: RxNorm code 8152</li> <li>• Bupropion: RxNorm code 42347</li> <li>• Naltrexone: RxNorm code 7243</li> <li>• Topiramate: RxNorm code 38404</li> </ul>                                                                                                                                                                                                                                                                                                                                                                                                                                                              | present/absent |
|                                                                    | Naltrexone/Topiramate                  | <ul style="list-style-type: none"> <li>• Naltrexone: RxNorm code 7243</li> <li>• Topiramate: RxNorm code 38404</li> </ul>                                                                                                                                                                                                                                                                                                                                                                                                                                                                                                                                                                                        |                |
|                                                                    | Non- GLP-1RA anti-diabetes medications | <ul style="list-style-type: none"> <li>• Drugs used in diabetes (ATC code: A10) with GLP-1RA medications (lixisenatide, albiglutide, dulaglutide, liraglutide, exenatide, tirzepatide) excluded.</li> </ul>                                                                                                                                                                                                                                                                                                                                                                                                                                                                                                      | present/absent |
| <b>Outcome</b>                                                     | AUD diagnosis                          | Alcohol use disorders (ICD-10 code: F10)                                                                                                                                                                                                                                                                                                                                                                                                                                                                                                                                                                                                                                                                         | present/absent |
| <b>Demographics<br/>(variables to be propensity-score matched)</b> | Age at the index event                 | Age                                                                                                                                                                                                                                                                                                                                                                                                                                                                                                                                                                                                                                                                                                              | continuous     |
|                                                                    | Female                                 | F                                                                                                                                                                                                                                                                                                                                                                                                                                                                                                                                                                                                                                                                                                                | present/absent |
|                                                                    | Male                                   | M                                                                                                                                                                                                                                                                                                                                                                                                                                                                                                                                                                                                                                                                                                                | present/absent |
|                                                                    | Asian                                  | Asian (Demographics: 2028-9)                                                                                                                                                                                                                                                                                                                                                                                                                                                                                                                                                                                                                                                                                     | present/absent |
|                                                                    | Black or African American              | Black or African American (Demographics: 2054-5)                                                                                                                                                                                                                                                                                                                                                                                                                                                                                                                                                                                                                                                                 | present/absent |

|                                                                                                                                                                            |                                                                                                       |                                                                                                                                                                                                                                                                                                                                                                                                                                                                                                                                                                                                                                                                                                                                                                                                                                         |                |
|----------------------------------------------------------------------------------------------------------------------------------------------------------------------------|-------------------------------------------------------------------------------------------------------|-----------------------------------------------------------------------------------------------------------------------------------------------------------------------------------------------------------------------------------------------------------------------------------------------------------------------------------------------------------------------------------------------------------------------------------------------------------------------------------------------------------------------------------------------------------------------------------------------------------------------------------------------------------------------------------------------------------------------------------------------------------------------------------------------------------------------------------------|----------------|
|                                                                                                                                                                            | White                                                                                                 | White (Demographics: 2106-3)                                                                                                                                                                                                                                                                                                                                                                                                                                                                                                                                                                                                                                                                                                                                                                                                            | present/absent |
|                                                                                                                                                                            | Hispanic/Latino                                                                                       | Hispanic or Latino (Demographics: 2135-2)                                                                                                                                                                                                                                                                                                                                                                                                                                                                                                                                                                                                                                                                                                                                                                                               | present/absent |
|                                                                                                                                                                            | Not Hispanic or Latino                                                                                | Not Hispanic or Latino (Demographics: 2186-5)                                                                                                                                                                                                                                                                                                                                                                                                                                                                                                                                                                                                                                                                                                                                                                                           | present/absent |
|                                                                                                                                                                            | Unknown race                                                                                          | Unknown Race (Demographics: 2131-1)                                                                                                                                                                                                                                                                                                                                                                                                                                                                                                                                                                                                                                                                                                                                                                                                     | present/absent |
|                                                                                                                                                                            | Unknown ethnicity                                                                                     | Unknown Ethnicity (Demographics: UN)                                                                                                                                                                                                                                                                                                                                                                                                                                                                                                                                                                                                                                                                                                                                                                                                    | present/absent |
|                                                                                                                                                                            | Divorced                                                                                              | Divorced (Demographics: D)                                                                                                                                                                                                                                                                                                                                                                                                                                                                                                                                                                                                                                                                                                                                                                                                              | present/absent |
|                                                                                                                                                                            | Widowed                                                                                               | Widowed (Demographics: W)                                                                                                                                                                                                                                                                                                                                                                                                                                                                                                                                                                                                                                                                                                                                                                                                               | present/absent |
|                                                                                                                                                                            | Never married                                                                                         | Never Married (Demographics: S)                                                                                                                                                                                                                                                                                                                                                                                                                                                                                                                                                                                                                                                                                                                                                                                                         | present/absent |
| <b>Adverse socioeconomic determinants of health, lifestyle factors, medical conditions, medication prescriptions, (anytime to before or on the day of the index event)</b> | Adverse socioeconomic and psychosocial circumstances                                                  | <p>Persons with potential health hazards related to socioeconomic and psychosocial circumstances (ICD-10 code: Z55-Z65)</p> <ul style="list-style-type: none"> <li>• Problems related to education and literacy (ICD-10 code: Z55)</li> <li>• Problems related to employment and unemployment (ICD-10 code: Z56)</li> <li>• Problems related to housing and economic circumstances (ICD-10 code: Z59)</li> <li>• Problems related to social environment (ICD-10 code: Z60)</li> <li>• Problems related to upbringing (ICD-10 code: Z62)</li> <li>• Other problems related to primary support group, including family circumstances (ICD-10 code: Z63)</li> <li>• Problems related to certain psychosocial circumstances ICD-10 code: Z64)</li> <li>• Problems related to other psychosocial circumstances (ICD-10 code: Z65)</li> </ul> | present/absent |
|                                                                                                                                                                            | Problems related to lifestyle                                                                         | <p>Problems related to lifestyle (ICD-10 code: Z72)</p> <ul style="list-style-type: none"> <li>• Tobacco use (ICD-10 code: Z72.0)</li> <li>• Lack of physical exercise ((ICD-10 code: Z72.3)</li> <li>• Inappropriate diet and eating habits (ICD-10 code: Z72.4)</li> <li>• High risk sexual behavior (ICD-10 code: Z72.5)</li> <li>• Gambling and betting (ICD-10 code: Z72.6)</li> <li>• Other problems related to lifestyle (ICD-10 code: Z72.8)</li> <li>• Problem related to lifestyle, unspecified (ICD-10 code: Z72.9)</li> </ul>                                                                                                                                                                                                                                                                                               | present/absent |
|                                                                                                                                                                            | Depression                                                                                            | Depressive episode (ICD-10 code: F32)                                                                                                                                                                                                                                                                                                                                                                                                                                                                                                                                                                                                                                                                                                                                                                                                   | present/absent |
|                                                                                                                                                                            | Mood disorders                                                                                        | Mood [affective] disorders (ICD-10 code: F30-F39)                                                                                                                                                                                                                                                                                                                                                                                                                                                                                                                                                                                                                                                                                                                                                                                       | present/absent |
|                                                                                                                                                                            | Anxiety, dissociative, , somatoform and other nonpsychotic mental disorders including PTSD            | Anxiety, dissociative, stress-related, somatoform and other nonpsychotic mental disorders (ICD-10 code: F40-F48)                                                                                                                                                                                                                                                                                                                                                                                                                                                                                                                                                                                                                                                                                                                        | present/absent |
| Schizophrenia, schizotypal, delusional, and other non-mood psychotic disorders                                                                                             | Schizophrenia, schizotypal, delusional, and other non-mood psychotic disorders (ICD-10 code: F20-F29) | present/absent                                                                                                                                                                                                                                                                                                                                                                                                                                                                                                                                                                                                                                                                                                                                                                                                                          |                |

|                                                                                              |                                                                                                                     |                |
|----------------------------------------------------------------------------------------------|---------------------------------------------------------------------------------------------------------------------|----------------|
| Behavioral disorders including sleep disorders                                               | Behavioral syndromes associated with physiological disturbances and physical factors (ICD-10 code: F50-F59)         | present/absent |
| Disorders of adult personality and behavior including impulse and gender identity disorders  | Disorders of adult personality and behavior (ICD-10 code: F60-F69)                                                  | present/absent |
| Behavioral and emotional disorders with onset usually occurring in childhood and adolescence | Behavioral and emotional disorders with onset usually occurring in childhood and adolescence (ICD-10 code: F90-F98) | present/absent |
| Conduct disorders                                                                            | Conduct disorders ((ICD-10 code: F90)                                                                               | present/absent |
| Symptoms and signs involving emotional state                                                 | Symptoms and signs involving emotional state (ICD-10 code: R45)                                                     | present/absent |
| Chronic pain                                                                                 | Chronic pain, not elsewhere classified (ICD-10 code: G89.2)                                                         | present/absent |
| Cannabis related disorders                                                                   | Cannabis related disorders (ICD-10 code: F12)                                                                       |                |
| Opioid use disorder                                                                          | Opioid use disorders (ICD-10 code: F11)                                                                             | present/absent |
| Tobacco use disorder                                                                         | Nicotine dependence (ICD-10 code: F17)                                                                              | present/absent |
| Cocaine use disorder                                                                         | Cocaine use disorders (ICD-10 code: F14)                                                                            | present/absent |
| Other stimulant disorders                                                                    | Other stimulant disorders (ICD-10 code: F15)                                                                        | present/absent |
| Other psychoactive substance related disorders                                               | Other psychoactive substance related disorders (ICD-10 code: F19)                                                   | present/absent |
| Family history of mental and behavioral disorders                                            | Family history of mental and behavioral disorders (ICD-10 code: Z81)                                                | present/absent |
| Substance Abuse Treatment                                                                    | Substance Abuse Treatment (HCPCS Code: H)                                                                           | present/absent |
| Psychotherapy Services and Procedures                                                        | Psychotherapy Services and Procedures (CPT code: 1021137)                                                           | present/absent |
| Acamprosate                                                                                  | acamprosate (RxNorm code: 82819)                                                                                    | present/absent |
| Disulfiram                                                                                   | disulfiram (RxNorm code: 3554)                                                                                      | present/absent |
| Baclofen                                                                                     | baclofen (RxNorm code: 1292)                                                                                        | present/absent |
| gabapentin                                                                                   | gabapentin (RxNorm code: 25480)                                                                                     | present/absent |
| Outpatient visit                                                                             | Visit: Ambulatory (visit type code: AMB)                                                                            | present/absent |
| Inpatient visit                                                                              | Visit: Inpatient Encounter (visit type code: IMP)                                                                   | present/absent |
| Emergency visit                                                                              | Visit: Emergency (visit type code: EMER)                                                                            | present/absent |
| Virtual visit                                                                                | Visit: Virtual (visit type code: VR)                                                                                | present/absent |
